# Supplementary material
Source: Springer Nature journal article supplement (https://www.springermedizin.de/resource/supplementary/13014_2014_1155_MOESM3_ESM.pdf/9635000)

A

## Overall survival

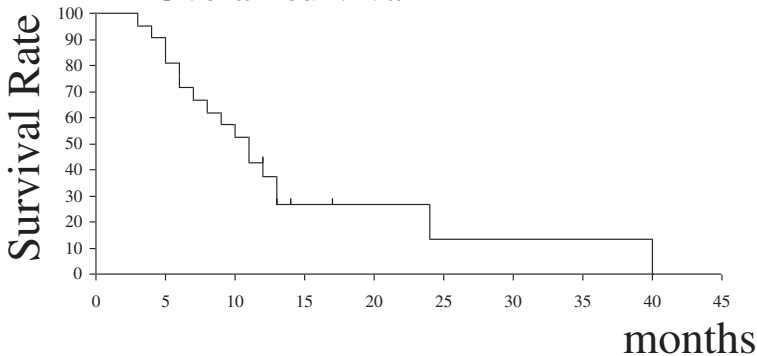

B

## Progression-free survival

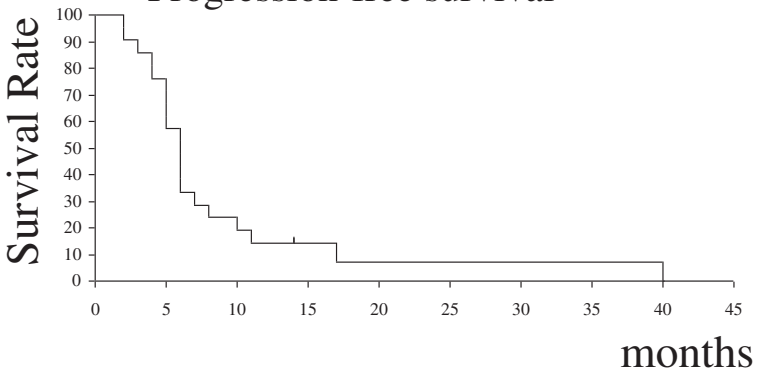

Supplement: MOESM3 [file 9635000]
